# Supplementary material for: Remittances, Regime Type, and Government Spending Priorities
Source: Springer Nature journal article supplement (doi:10.1007/s12116-016-9233-7), 2016-12-22
Supplement: MOESM1 [file 11953886]

SUPPLEMENTARY INFORMATION

“Remittances, Regime Type, and Government Spending Priorities”

| Appendix 1: Sample of Countries | | |
| --- | --- | --- |
| Albania | Ghana | Pakistan |
| Algeria | Grenada | Panama |
| Argentina | Guatemala | Papua New Guinea |
| Bangladesh | Guinea | Paraguay |
| Barbados | Guyana | Peru |
| Belarus | Honduras | Philippines |
| Belize | India | Poland |
| Benin | Indonesia | Romania |
| Bhutan | Iran | Rwanda |
| Bolivia | Jamaica | Samoa |
| Botswana | Jordan | Saudi Arabia |
| Brazil | Kenya | Senegal |
| Bulgaria | Laos | Sierra Leone |
| Burkina Faso | Latvia | Solomon Islands |
| Burundi | Lebanon | South Africa |
| Cambodia | Lesotho | Sri Lanka |
| Cameroon | Libya | St. Lucia |
| Cape Verde | Lithuania | St. Vincent& Grenadines |
| Central African Republic | Madagascar | Suriname |
| Chile | Malawi | Swaziland |
| China | Malaysia | Syria |
| Colombia | Maldives | Tanzania |
| Comoros | Mali | Thailand |
| Republic of Congo | Mauritania | Togo |
| Costa Rica | Mauritius | Trinidad &Tobago |
| Croatia | Mexico | Tunisia |
| Djibouti | Moldova | Turkey |
| Dominican Republic | Mongolia | Uganda |
| Ecuador | Morocco | Ukraine |
| Egypt | Mozambique | Uruguay |
| El Salvador | Namibia | Vanuatu |
| Eritrea | Nepal | Venezuela |
| Ethiopia | Nicaragua | Vietnam |
| Fiji | Niger | Yemen |
| Gabon | Nigeria | Zambia |
| Gambia | Oman |  |

| Appendix 2. Summary Statistics | | | | | |
| --- | --- | --- | --- | --- | --- |
| Variable | Obs | Mean | Std. Dev. | Min | Max |
| Ln(Education Spending per capita) | 1,797 | 4.55 | 0.35 | 2.18 | 5.74 |
| Ln(Health Spending per capita) | 1,864 | 4.55 | 0.37 | 1.92 | 5.74 |
| Ln(Military Spending per capita) | 2,079 | 3.21 | 1.96 | 0 | 23.20 |
| Ln(Military/Education Spending) | 1,573 | 0.49 | 0.42 | 0 | 3.72 |
| Ln(Military/Health Spending) | 1,588 | 0.74 | 0.60 | 0.00 | 5.40 |
| Ln(Remittances per capita) | 2,492 | 3.17 | 1.90 | 0 | 19.77 |
| Rescaled Vanhanen Index | 2,492 | 0.25 | 0.19 | 0 | 0.81 |
| Rescaled UDS | 2,470 | 0.57 | 0.19 | 0.04 | 1 |
| Ln(ODA per capita) | 2,372 | 5.37 | 0.40 | 0 | 7.13 |
| % Population under 15 | 2,393 | 36.84 | 8.50 | 13.50 | 53.02 |
| % Urban population | 2,492 | 0.44 | 0.19 | 0.05 | 0.93 |
| Ln(Debt service per capita) | 2,282 | 3.52 | 1.94 | 0.00 | 24.96 |
| Ln(Inflation) | 2,462 | 3.82 | 0.45 | 1.53 | 9.42 |
| Ln(GDP) | 2,456 | 22.64 | 2.01 | 18.12 | 28.70 |
| Ln(population) | 2,492 | 15.55 | 2.12 | 10.61 | 21.02 |

| Appendix 3: Controls for Spending Models | |
| --- | --- |
| Variables | Source |
| Official Development Assistance | Logged net transfers of official development assistance (*ODA)*, as calculated by Roodman (2005); Roodman’s data are available at: <http://www.cgdev.org/publication/net-aid-transfers-data-set-1960%E2%80%932012> |
| Population Under 14a | World Bank’s World Development Indicators available at: <http://data.worldbank.org/data-catalog/world-development-indicators> |
| Urban Populationa | World Bank’s World Development Indicators |
| Domestic Conflictb | Center for Systemic Peace, Major Episodes of Political Violence Dataset: <http://www.systemicpeace.org/inscrdata.html>; INTTOT and CIVTOT are used to create dummy variables for interstate and domestic conflict |
| International Conflictb | Center for Systemic Peace, Major Episodes of Political Violence Dataset |
| Debt Service | World Bank’s World Development Indicators |
| Inflation | World Bank’s World Development Indicators |
| GDP | World Bank’s World Development Indicators |
| Population | World Bank’s World Development Indicators |

Notes: aFor welfare goods spending models only; bFor military spending models only

CHANGE TO APPENDIX 5

| Appendix 6. Spending Models with UDS as Regime Variable | | | | |
| --- | --- | --- | --- | --- |
|  | Education | Health | Military |
| Remittances | -0.071** | -0.057* | 0.103** |
|  | (0.035) | (0.029) | (0.043) |
| Remittances*Regime | 0.115** | 0.085** | -0.094 |
|  | (0.046) | (0.042) | (0.068) |
| Regime | 2.126*** | 0.872 | -0.503 |
|  | (0.701) | (1.028) | (1.345) |
| Official Development Assistance | 0.347*** | 0.181 | 0.010 |
|  | (0.117) | (0.155) | (0.165) |
| ODA*Regime | -0.427*** | -0.182 | 0.136 |
|  | (0.153) | (0.199) | (0.250) |
| Population Under 15 | 0.004 | -0.000 | 0.092*** |
|  | (0.004) | (0.006) | (0.034) |
| Urban Population | 0.491 | 0.151 | 0.028 |
|  | (0.299) | (0.375) | (0.085) |
| Debt Service | -0.022** | -0.030*** | 0.140*** |
|  | (0.009) | (0.010) | (0.030) |
| Inflation | 0.011 | 0.046 | -0.160*** |
|  | (0.033) | (0.028) | (0.058) |
| GDP | 0.264*** | 0.337*** | 0.065 |
|  | (0.074) | (0.093) | (0.094) |
| Population | -0.178 | -0.036 | 0.239 |
|  | (0.130) | (0.142) | (0.231) |
| Lagged Dependent Variable | 0.724*** | 0.602*** | 0.704*** |
|  | (0.048) | (0.049) | (0.026) |
| Constant | -3.991 | -6.269** | -4.765 |
|  | (2.712) | (2.936) | (4.518) |
| Observations (Countries) | 1,364 (99) | 1,418 (104) | 1,511 (96) |
| F-test (Prob > F) | 170.4 (.000) | 119 (.000) | 1221 (.000) |
| All models include country- and year-fixed effects. Robust clustered standard errors in parentheses. *** p<0.01, ** p<0.05, * p<0.1 | | | | |

APPENDIX 7. NOTES AND MAIN RESULTS FOR 2SLS REGRESSIONS

To perform the 2SLS regressions below, we used the second lags of the potentially endogenous variables—the remittance variable and its interaction with regime--as instruments. To perform instrument diagnostic tests, we augment these instruments with higher order moments of the instruments as suggested by Lewbel (1997). In particular, we mean-center and square *Remittances* and *Remittances*Regime*. These instruments have no substantive theoretical motivation but are exogenous and relevant by construction and used simply to supplement other instruments. First-stage results for the education and health models are reported in Appendix 8. First-stage results for the military model are reported in Appendix 9. 2SLS results without the synthetic instruments suggested by Lewbel (1997) are reported in Appendices 9 and 10. Diagnostic tests for instrument validity are reported in the bottom half of Appendix 7.

| Appendix 7. Spending Models (2SLS) | | | | | | | |
| --- | --- | --- | --- | --- | --- | --- | --- |
|  |  | Education | | Health | | Military | |
| Remittances |  | -0.052** | | -0.050** | | 0.103*** | |
|  |  | (0.021) | | (0.020) | | (0.027) | |
| Remittances*Regime |  | 0.133*** | | 0.133*** | | -0.209** | |
|  |  | (0.036) | | (0.049) | | (0.096) | |
| Regime |  | 2.096*** | | 1.421 | | -2.417 | |
|  |  | (0.784) | | (1.089) | | (1.545) | |
| Official Development Assistance |  | 0.208*** | | 0.184** | | -0.039 | |
|  |  | (0.066) | | (0.089) | | (0.102) | |
| ODA*Regime |  | -0.475*** | | -0.343 | | 0.548* | |
|  |  | (0.162) | | (0.218) | | (0.317) | |
| Domestic Conflict |  | 0.005 | | -0.001 | | 0.104*** | |
|  |  | (0.004) | | (0.006) | | (0.039) | |
| Interstate Conflict |  | 0.580* | | 0.226 | | 0.055 | |
|  |  | (0.339) | | (0.427) | | (0.086) | |
| Debt Service |  | -0.026** | | -0.040*** | | 0.129*** | |
|  |  | (0.010) | | (0.011) | | (0.022) | |
| Inflation |  | -0.018 | | 0.020 | | -0.090 | |
|  |  | (0.030) | | (0.028) | | (0.057) | |
| GDP |  | 0.338*** | | 0.365*** | | 0.147 | |
|  |  | (0.066) | | (0.094) | | (0.109) | |
| Population |  | -0.100 | | 0.034 | | 0.059 | |
|  |  | (0.132) | | (0.154) | | (0.274) | |
| Lagged Dependent Variable |  | 0.690*** | | 0.566*** | | 0.677*** | |
|  |  | (0.052) | | (0.051) | | (0.030) | |
| Observations (Countries) |  | 1,304 (94) | | 1,369 (103) | | 1,405 (93) | |
| Underidentification test  Kleibergen–Paap rk LM statistic (p-value) | | | 23.8 (.000) | | 23.0 (.000) | | 32.6 (.000) |
| Weak identification test  Kleibergen–Paap Wald rk F statistic  Stock-Yogo weak ID test critical values (range) | | | 84.8  16.9-6.28 | | 78.9  16.9-6.28 | | 259.3  16.87-6.28 |
| Overidentification test  Hansen J statistic (p-value) | | | 2.06 (.356) | | .558 (.756) | | 3.57 (.168) |
| All models include country- and year-fixed effects. Robust clustered standard errors in parentheses. *** p<0.01, ** p<0.05, * p<0.1 | | | | | | | |

| Appendix 8. First-Stage Regressions (W Goods Spending Models) | | | | |
| --- | --- | --- | --- | --- |
|  | Education Spending | | Health Spending | |
| Instruments | L.Remittances | L.Remittances*  Regime | L.Remittances | L.Remittances*  Regime |
| L2.Remittances | 0.824*** | 0.108*** | 0.828*** | 0.117*** |
|  | (0.035) | (0.021) | (0.036) | (0.021) |
| L2.Remittances*Regime | -0.300*** | 0.148*** | -0.287*** | 0.157*** |
|  | (0.085) | (0.044) | (0.071) | (0.049) |
| L.(Mean-centered Remittances)2 | -0.042**  (0.02) | 0.017**  (0.009) | -0.039*  (0.020) | -0.014**  (0.007) |
| L.(Mean-centered Remittances*Regime) 2 | 0.210***  (0.055) | 0.200***  (0.022) | 0.199***  (0.053) | 0.191***  (0.022) |
|  |  |  |  |  |
| Regime | -0.377 | -1.538 | -0.603 | -1.797 |
|  | (2.832) | (1.224) | (2.761) | (1.205) |
| Official Development Assistance | -0.030 | -0.284*** | -0.044 | -0.315*** |
|  | (0.201) | (0.091) | (0.204) | (0.089) |
| ODA*Regime | 0.132 | 0.762*** | 0.176 | 0.808*** |
|  | (0.542) | (0.250) | (0.539) | (0.238) |
| Population Under 15 | 0.029** | 0.010 | 0.028* | 0.012 |
|  | (0.014) | (0.008) | (0.015) | (0.009) |
| Urban Population | 0.532 | 0.433 | -0.232 | -0.012 |
|  | (0.841) | (0.572) | (0.837) | (0.485) |
| Debt Service | 0.110*** | 0.037** | 0.093*** | 0.025 |
|  | (0.033) | (0.016) | (0.029) | (0.016) |
| Inflation | -0.354*** | -0.107*** | -0.305*** | -0.092*** |
|  | (0.080) | (0.033) | (0.082) | (0.031) |
| GDP | -0.129 | -0.078 | -0.047 | 0.033 |
|  | (0.151) | (0.110) | (0.161) | (0.109) |
| Population | 0.159 | -0.311 | 0.294 | -0.294 |
|  | (0.361) | (0.230) | (0.348) | (0.227) |
| Lagged Dependent Variable | -0.001 | 0.079*** | 0.008 | 0.014 |
|  | (0.062) | (0.028) | (0.060) | (0.035) |
| Angrist-Pischke F test | 178.21 | 47.16 | 216.27 | 45.01 |
| Observations (Countries) | 1304 (94) | | 1369 (103) | |

| Appendix 9. First-Stage Regressions (Military Spending Models) | | |
| --- | --- | --- |
| Instruments | L.Remittances | L.Remittances*  Regime |
| L2.Remittances | 0.805*** | 0.121*** |
|  | (0.035) | (0.022) |
| L2.Remittances*Regime | -0.087 | 0.216*** |
|  | (0.065) | (0.056) |
| L.(Mean-centered Remittances)2 | -0.002  (0.004) | -0.010***  (0.002) |
| L.(Mean-centered Remittances*Regime) 2 | 0.049***  (0.015) | 0.149***  (0.011) |
|  |  |  |
| Regime | -0.643 | -3.635* |
|  | (2.218) | (2.142) |
| Official Development Assistance | 0.026 | -0.260** |
|  | (0.144) | (0.113) |
| ODA*Regime | 0.155 | 1.128*** |
|  | (0.421) | (0.419) |
| Domestic Conflict | -0.007 | 0.059** |
|  | (0.045) | (0.025) |
| Interstate Conflict | -0.103 | 0.043 |
|  | (0.104) | (0.059) |
| Debt Service | 0.093*** | 0.051*** |
|  | (0.028) | (0.018) |
| Inflation | -0.366*** | -0.097*** |
|  | (0.056) | (0.024) |
| GDP | -0.284* | 0.057 |
|  | (0.162) | (0.099) |
| Population | 0.009 | -0.399* |
|  | (0.338) | (0.209) |
| Lagged Dependent Variable | 0.073** | -0.016 |
|  | (0.032) | (0.016) |
| Angrist-Pischke F test | 200.10 (.000) | 143.87 (.000) |
| Observations (Countries) | 1405 (93) | |

| Appendix 10. Remittances, Regime Type, and Welfare Goods Spending  (2SLS Regressions without synthetic instruments) | | |
| --- | --- | --- |
|  | Education | Health |
| Remittances | -0.051** | -0.049** |
|  | (0.022) | (0.022) |
| Remittances*Regime | 0.143*** | 0.132** |
|  | (0.050) | (0.062) |
| Regime | 2.145*** | 1.415 |
|  | (0.797) | (1.089) |
| Official Development Assistance | 0.213*** | 0.183** |
|  | (0.069) | (0.090) |
| ODA*Regime | -0.490*** | -0.341 |
|  | (0.169) | (0.220) |
| Population Under 15 | 0.005 | -0.001 |
|  | (0.004) | (0.006) |
| Urban Population | 0.573* | 0.229 |
|  | (0.333) | (0.424) |
| Debt Service | -0.029*** | -0.041*** |
|  | (0.010) | (0.012) |
| Inflation | -0.018 | 0.020 |
|  | (0.030) | (0.028) |
| GDP | 0.341*** | 0.365*** |
|  | (0.067) | (0.094) |
| Population | -0.088 | 0.034 |
|  | (0.133) | (0.155) |
| Lagged Dependent Variable | 0.688*** | 0.567*** |
|  | (0.053) | (0.052) |
| Observations (Countries) | 1,304 (94) | 1,369 (103) |
| Underidentification test  Kleibergen–Paap rk LM statistic (p-value) | 18.8 (.000) | 19.2 (.000) |
| Weak identification test  Kleibergen–Paap Wald rk F statistic  Stock-Yogo weak ID test critical values (range) | 14.9  7.03-3.63 | 17.1  7.03-3.63 |
| Overidentification test  Hansen J statistic (p-value) | NA | NA |
| All models include country- and year-fixed effects, and robust clustered standard errors in parentheses.  *** p<0.01, ** p<0.05, * p<0.1. | | |

| Appendix 11. Remittances, Regime Type, and Military Spending  (2SLS Regressions without synthetic instruments) | |
| --- | --- |
| Remittances | 0.083*** |
|  | (0.025) |
| Remittances*Regime | -0.127 |
|  | (0.078) |
| Regime | -2.118 |
|  | (1.539) |
| Official Development Assistance | -0.007 |
|  | (0.097) |
| ODA*Regime | 0.442 |
|  | (0.306) |
| Domestic Conflict | 0.096** |
|  | (0.038) |
| Interstate Conflict | 0.048 |
|  | (0.089) |
| Debt Service | 0.128*** |
|  | (0.023) |
| Inflation | -0.106 |
|  | (0.068) |
| GDP | 0.122 |
|  | (0.109) |
| Population | 0.147 |
|  | (0.254) |
| Lagged Dependent Variable | 0.681*** |
|  | (0.029) |
| Observations (Countries) | 1405 (93) |
| Underidentification test  Kleibergen–Paap rk LM statistic (p-value) | 6.56 (.010) |
| Weak identification test  Kleibergen–Paap Wald rk F statistic  Stock-Yogo weak ID test critical values (range) | 24.9  7.03–3.63 |
| Overidentification test  Hansen J statistic (p-value) | NA |

| Appendix 12. Remittances, Regime Type and Education Spending  (Excluding one region at a time) | | | | | | | |
| --- | --- | --- | --- | --- | --- | --- | --- |
|  | (1) | (2) | (3) | (4) | (5) | (6) | (7) |
|  | Full Sample | Asia | Post-Communist | Latin America | MENA | SubSaharan Africa | Jacknife S.E. |
| Remittances | -0.038** | -0.027*** | -0.042** | -0.037* | -0.042** | -0.050 | -0.038* |
|  | (0.018) | (0.010) | (0.019) | (0.021) | (0.018) | (0.031) | (0.021) |
| Remittances*Regime | 0.124*** | 0.108*** | 0.128*** | 0.120*** | 0.128*** | 0.142** | 0.124*** |
|  | (0.034) | (0.026) | (0.037) | (0.040) | (0.035) | (0.054) | (0.040) |
| Regime | 1.857*** | 1.454** | 2.292*** | 0.268 | 2.005** | 1.579** | 1.857* |
|  | (0.691) | (0.620) | (0.719) | (1.084) | (0.807) | (0.729) | (1.086) |
| Official Development Assistance | 0.188*** | 0.141*** | 0.214*** | 0.277*** | 0.204*** | 0.152** | 0.188** |
|  | (0.057) | (0.049) | (0.059) | (0.084) | (0.069) | (0.058) | (0.081) |
| ODA*Regime | -0.421*** | -0.335*** | -0.501*** | -0.124 | -0.452*** | -0.383*** | -0.421* |
|  | (0.142) | (0.119) | (0.148) | (0.212) | (0.164) | (0.144) | (0.215) |
| Population Under 15 | 0.004 | 0.007* | 0.003 | 0.003 | 0.004 | 0.001 | 0.004 |
|  | (0.003) | (0.004) | (0.003) | (0.003) | (0.004) | (0.006) | (0.004) |
| Urban Population | 0.527* | 0.366 | 0.641** | 0.751** | 0.449 | 0.503* | 0.527 |
|  | (0.291) | (0.300) | (0.295) | (0.348) | (0.324) | (0.289) | (0.331) |
| Debt Service | -0.022** | -0.024*** | -0.023** | -0.018 | -0.021** | -0.022** | -0.022** |
|  | (0.009) | (0.009) | (0.009) | (0.013) | (0.010) | (0.009) | (0.010) |
| Inflation | 0.010 | 0.014 | 0.019 | 0.022 | 0.015 | -0.029 | 0.010 |
|  | (0.034) | (0.036) | (0.041) | (0.041) | (0.035) | (0.026) | (0.041) |
| GDP | 0.253*** | 0.218** | 0.240*** | 0.226*** | 0.233*** | 0.351*** | 0.253*** |
|  | (0.073) | (0.096) | (0.074) | (0.085) | (0.077) | (0.056) | (0.089) |
| Population | -0.085 | -0.199 | -0.017 | -0.050 | -0.056 | -0.116 | -0.085 |
|  | (0.117) | (0.124) | (0.116) | (0.144) | (0.125) | (0.146) | (0.140) |
| Lagged Dependent Variable | 0.728*** | 0.683*** | 0.736*** | 0.714*** | 0.740*** | 0.763*** | 0.728*** |
|  | (0.048) | (0.051) | (0.048) | (0.059) | (0.048) | (0.044) | (0.058) |
| Constant | -4.383* | -1.337 | -5.395** | -4.769 | -4.472* | -6.041** | -4.383 |
|  | (2.491) | (2.490) | (2.512) | (2.989) | (2.645) | (2.952) | (3.020) |
| Observations (Countries) | 1,377 (100) | 1,081 (79) | 1,271 (90) | 1,004 (76) | 1,238 (89) | 914 (66) | 1,377 (100) |
| F-test (Prob > F) | 150.9 (.000) | 190.7 (.000) | 158.7 (.000) | 152.5 (.000) | 157 (.000) | 190.7 (.000) | 114.3 (.000) |
| All models include country- and year-fixed effects. Robust clustered standard errors in parentheses. *** p<0.01, ** p<0.05, * p<0.1 | | | | | | | |

| Appendix 13. Remittances, Regime Type and Health Spending  (Excluding one region at a time) | | | | | | | | |
| --- | --- | --- | --- | --- | --- | --- | --- | --- |
|  | (1) | (2) | (3) | (4) | (5) | (6) | (7) |
| Excluding: | Full Sample | Asia | Post-Communist | Latin America | MENA | SubSaharan Africa | Jacknife S.E. |
| Remittances | -0.034** | -0.053*** | -0.033* | -0.036* | -0.033* | -0.002 | -0.034* |
|  | (0.016) | (0.016) | (0.018) | (0.019) | (0.017) | (0.020) | (0.018) |
| Remittances*Regime | 0.094*** | 0.135*** | 0.094** | 0.081* | 0.095** | 0.031 | 0.094** |
|  | (0.036) | (0.037) | (0.041) | (0.042) | (0.038) | (0.039) | (0.041) |
| Regime | 0.887 | 0.823 | 0.831 | 0.886 | 1.191 | 0.943 | 0.887 |
|  | (0.935) | (1.210) | (0.984) | (1.137) | (1.046) | (0.823) | (1.065) |
| Official Development Assistance | 0.131* | 0.135 | 0.124 | 0.190** | 0.150* | 0.109* | 0.131 |
|  | (0.077) | (0.098) | (0.082) | (0.091) | (0.087) | (0.062) | (0.088) |
| ODA*Regime | -0.214 | -0.237 | -0.198 | -0.200 | -0.269 | -0.193 | -0.214 |
|  | (0.185) | (0.238) | (0.197) | (0.224) | (0.207) | (0.152) | (0.209) |
| Population Under 15 | -0.001 | 0.004 | 0.000 | -0.007 | -0.001 | -0.008 | -0.001 |
|  | (0.005) | (0.006) | (0.006) | (0.006) | (0.005) | (0.007) | (0.006) |
| Urban Population | 0.209 | 0.135 | 0.336 | 0.349 | 0.216 | 0.191 | 0.209 |
|  | (0.362) | (0.449) | (0.383) | (0.501) | (0.392) | (0.375) | (0.414) |
| Debt Service | -0.030*** | -0.031*** | -0.027*** | -0.022 | -0.032*** | -0.038*** | -0.030*** |
|  | (0.009) | (0.010) | (0.010) | (0.013) | (0.009) | (0.009) | (0.011) |
| Inflation | 0.041 | 0.043 | 0.048 | 0.031 | 0.042 | 0.042* | 0.041 |
|  | (0.029) | (0.032) | (0.036) | (0.033) | (0.030) | (0.023) | (0.033) |
| GDP | 0.327*** | 0.324** | 0.318*** | 0.267*** | 0.332*** | 0.383*** | 0.327*** |
|  | (0.089) | (0.124) | (0.094) | (0.096) | (0.093) | (0.078) | (0.099) |
| Population | 0.048 | 0.015 | 0.161 | 0.099 | 0.066 | -0.251* | 0.048 |
|  | (0.132) | (0.166) | (0.138) | (0.150) | (0.138) | (0.150) | (0.151) |
| Lagged Dependent Variable | 0.604*** | 0.601*** | 0.599*** | 0.597*** | 0.602*** | 0.598*** | 0.604*** |
|  | (0.048) | (0.050) | (0.051) | (0.056) | (0.050) | (0.047) | (0.052) |
| Constant | -7.102*** | -6.557** | -8.806*** | -6.652** | -7.609*** | -3.433 | -7.102** |
|  | (2.579) | (3.106) | (2.667) | (2.837) | (2.646) | (2.899) | (2.975) |
| Observations (Countries) | 1,434 (105) | 1,151 (84) | 1,300 (93) | 1,044 (80) | 1,303 (93) | 938 (70) | 1434 (105) |
| F-test (Prob > F) | 147.5 (.000) | 180.7 (.000) | 140.4 (.000) | 135.1 (.000) | 146 (.000) | 219.9 (.000) | 115.7 (.000) |
| All models include country- and year-fixed effects. Robust clustered standard errors in parentheses. *** p<0.01, ** p<0.05, * p<0.1. aYear fixed effects not included due to lack of degrees of freedom. | | | | | | | | |

| Appendix 14. Remittances, Regime Type and Military Spending  (Excluding one region at a time) | | | | | | | |
| --- | --- | --- | --- | --- | --- | --- | --- |
|  | (1) | (2) | (3) | (4) | (5) | (6) | (7) |
|  | Full Sample | Asia | Post-Communist | Latin America | MENA | SubSaharan Africa | Jacknife S.E. |
| Remittances | 0.095*** | 0.098*** | 0.087*** | 0.082*** | 0.097*** | 0.097*** | 0.095** |
|  | (0.025) | (0.026) | (0.025) | (0.023) | (0.027) | (0.029) | (0.042) |
| Remittances*Regime | -0.183** | -0.201** | -0.180* | -0.038 | -0.179** | -0.210** | -0.183 |
|  | (0.085) | (0.085) | (0.091) | (0.070) | (0.090) | (0.084) | (0.157) |
| Regime | -2.061 | -1.383 | -1.949 | -1.647 | -2.943 | -1.988 | -2.061 |
|  | (1.544) | (1.895) | (1.426) | (1.824) | (1.827) | (1.695) | (2.043) |
| Official Development Assistance | -0.026 | 0.003 | -0.011 | 0.007 | -0.096 | -0.055 | -0.026 |
|  | (0.104) | (0.111) | (0.098) | (0.109) | (0.139) | (0.122) | (0.138) |
| ODA*Regime | 0.464 | 0.320 | 0.439 | 0.302 | 0.626* | 0.508 | 0.464 |
|  | (0.311) | (0.363) | (0.292) | (0.347) | (0.365) | (0.352) | (0.437) |
| Domestic Conflict | 0.105*** | 0.135*** | 0.095** | 0.082* | 0.108** | 0.099** | 0.105** |
|  | (0.036) | (0.042) | (0.036) | (0.044) | (0.041) | (0.037) | (0.041) |
| Interstate Conflict | 0.029 | 0.168* | 0.045 | -0.123 | 0.046 | -0.017 | 0.029 |
|  | (0.081) | (0.090) | (0.075) | (0.078) | (0.084) | (0.119) | (0.093) |
| Debt Service | 0.130*** | 0.137*** | 0.123*** | 0.103*** | 0.132*** | 0.145*** | 0.130*** |
|  | (0.022) | (0.023) | (0.021) | (0.027) | (0.025) | (0.027) | (0.029) |
| Inflation | -0.130*** | -0.114*** | -0.158*** | -0.027 | -0.132*** | -0.160*** | -0.130*** |
|  | (0.035) | (0.036) | (0.031) | (0.040) | (0.036) | (0.036) | (0.048) |
| GDP | 0.105 | 0.153 | 0.135 | 0.039 | 0.155 | -0.063 | 0.105 |
|  | (0.092) | (0.125) | (0.086) | (0.100) | (0.096) | (0.137) | (0.101) |
| Population | 0.042 | 0.240 | -0.112 | 0.168 | 0.079 | -0.239 | 0.042 |
|  | (0.252) | (0.285) | (0.252) | (0.270) | (0.274) | (0.362) | (0.295) |
| Lagged Dependent Variable | 0.692*** | 0.679*** | 0.711*** | 0.676*** | 0.683*** | 0.695*** | 0.692*** |
|  | (0.029) | (0.030) | (0.029) | (0.036) | (0.032) | (0.039) | (0.030) |
| Constant | -2.293 | -6.749 | -0.442 | -3.207 | -3.668 | 6.519 | -2.293 |
|  | (5.052) | (5.100) | (5.182) | (5.423) | (5.458) | (7.443) | (5.797) |
| Observations (Countries) | 1,511 (96) | 1,221 (81) | 1,368 (84) | 1,126 (75) | 1,338 (85) | 991 (59) | 1511 (96) |
| F-test (Prob > F) | 626.3 (.000) | 674.2 (.000) | 834.2 (.000) | 351.6 (.000) | 773.4 (.000) | 1448 (.000) | 355.4 (.000) |
| All models include country- and year-fixed effects. Robust clustered standard errors in parentheses. *** p<0.01, ** p<0.05, * p<0.1 | | | | | | | |

Fig.3. Effects of Remittances on Ratio of Military/Welfare Goods Spending.

| Appendix 16. Variable Description from LAPOP* | |
| --- | --- |
| Remittances | Does your family receive remittances from abroad? 1=Yes; 0=No |
| Regime | Rescaled Van Hanen democracy index: 0-.94 |
| Female | 1=Yes; 0=No |
| Age | Age of respondent |
| Age2 | Age of respondent squared |
| Income | Into which of the following income ranges does the total monthly income of this household fit, including remittances from abroad; 0-10, deciles based on the currency and distribution of the country |
| Urban | 1=Urban; 0=Rural |
| Education | Years of schooling, 0-18 |
| Bribe for Health | In order to receive attention in a (public) hospital or a clinic during the past year, did you have to pay a bribe? 1=Yes; 0=No |
| Bribe for Education | Have you had to pay a bribe at school during the past year? 1=Yes; 0=No |
| Tax for Services | Would you be willing to pay more taxes to the municipal govt so that it could provide better services or is it not worth it?; 1=willing to pay more; 0=not worth it |
| Influence | What is the way that you think you can have the most influence to change things? (1) Vote to elect those who support my position; (2) Participate in protest movements and demand changes directly; (3) Influence in other ways; (4) It is not possible to have influence in order to change things, it does not matter |
| Protest | Participated in protest or march in last 12 months?; 1=sometimes or almost never; 0=never |

*The AmericasBarometer by the Latin American Public Opinion Project (LAPOP) available at: www.LapopSurveys.org.

| Appendix 17. Effect of Remittances on Preferences for Public Services | | | |
| --- | --- | --- | --- |
|  | (A) | (B) | (C) |
|  | Bribe for Education | Bribe for Health | Tax for Services |
| Remittances | 0.558*** | 0.619*** | -0.436*** |
|  | (0.154) | (0.163) | (0.129) |
| Remittances*Regime | -0.728** | -0.816** | 1.109*** |
|  | (0.333) | (0.343) | (0.270) |
| Regime | 0.849** | 0.476 | -0.865* |
|  | (0.399) | (0.390) | (0.448) |
| Female | 0.057 | -0.074* | -0.273*** |
|  | (0.038) | (0.038) | (0.027) |
| Age | 0.026*** | -0.007 | -0.003 |
|  | (0.009) | (0.006) | (0.005) |
| Age2 | -0.000*** | 0.000 | 0.000 |
|  | (0.000) | (0.000) | (0.000) |
| Income | -0.050*** | -0.022** | 0.060*** |
|  | (0.011) | (0.011) | (0.007) |
| Urban | -0.027 | 0.019 | -0.073** |
|  | (0.022) | (0.049) | (0.037) |
| Education | -0.017*** | -0.020*** | 0.028*** |
|  | (0.005) | (0.005) | (0.004) |
| Observations (Countries) | 44,671 (22) | 39,380 (22) | 36,164 (18) |
| Log Likelihood | -11125.434 | -10458.174 | -17355.191 |
| All models include country, year, and wave fixed effects. ***p<0.01, **p<0.05, *p<0.1 | | | |

| Appendix 18. Effect of Remittances on Protest Participation | |
| --- | --- |
| Remittances | -0.314** |
|  | (0.160) |
| Remittances*Regime | 1.030*** |
|  | (0.310) |
| Regime | -1.237*** |
|  | (0.453) |
| Female | -0.214*** |
|  | (0.035) |
| Age | 0.020*** |
|  | (0.006) |
| Age2 | -0.000*** |
|  | (0.000) |
| Income | 0.007 |
|  | (0.010) |
| Urban | 0.050 |
|  | (0.048) |
| Education | 0.042*** |
|  | (0.005) |
| Observations (Countries) | 88,272 (22) |
| Log Likelihood | -34664.694 |
| ***p<0.01, **p<0.05, *p<0.1 | |
